# Supplementary material for: A sensitive sensor based on molecularly imprinted polypyrrole on reduced graphene oxide modified glassy carbon electrode for nevirapine analysis
Source: Royal Society of Chemistry journal article supplement (doi:10.1039/d1ay00500f), 2021-01-01
Supplement: d1ay00500f1.pdf [file d1ay00500f1.pdf]

### Supplementary Information

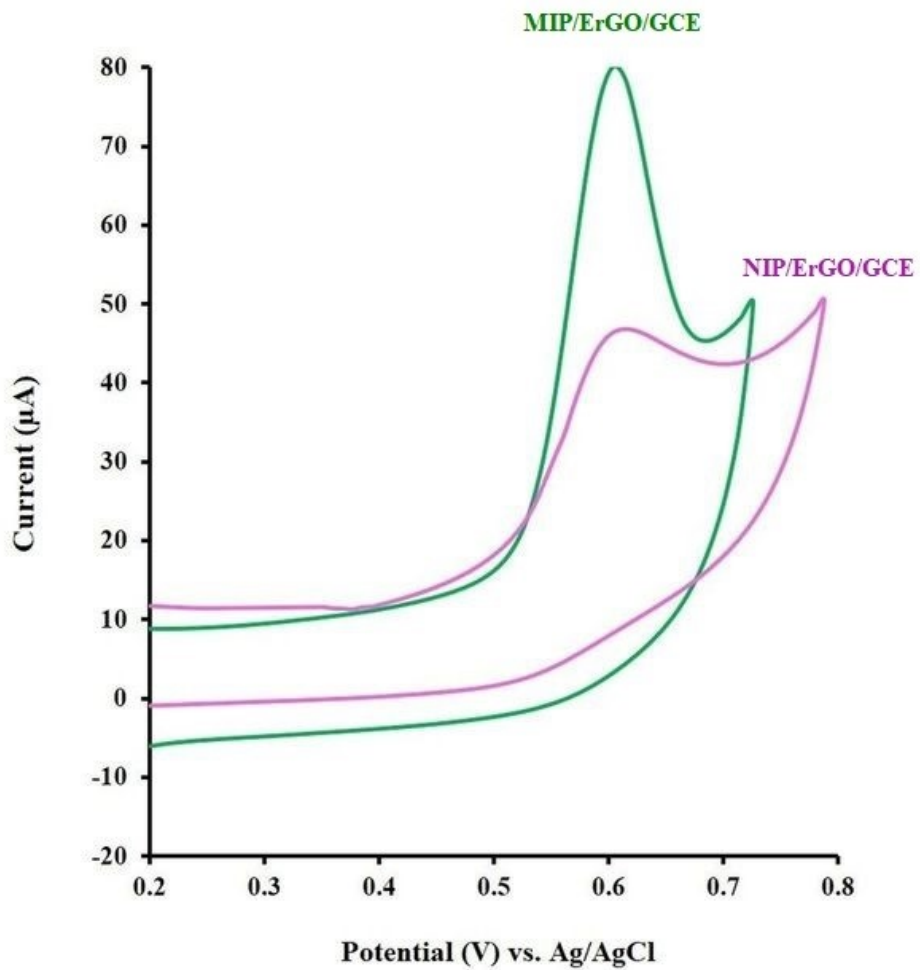

Fig. S1

CV of 100  $\mu\text{M}$  NVP at NIP/ErGO/GCE and MIP/ErGO/GCE in a solution containing NaOH (0.01 M) and KCl (0.1 M)

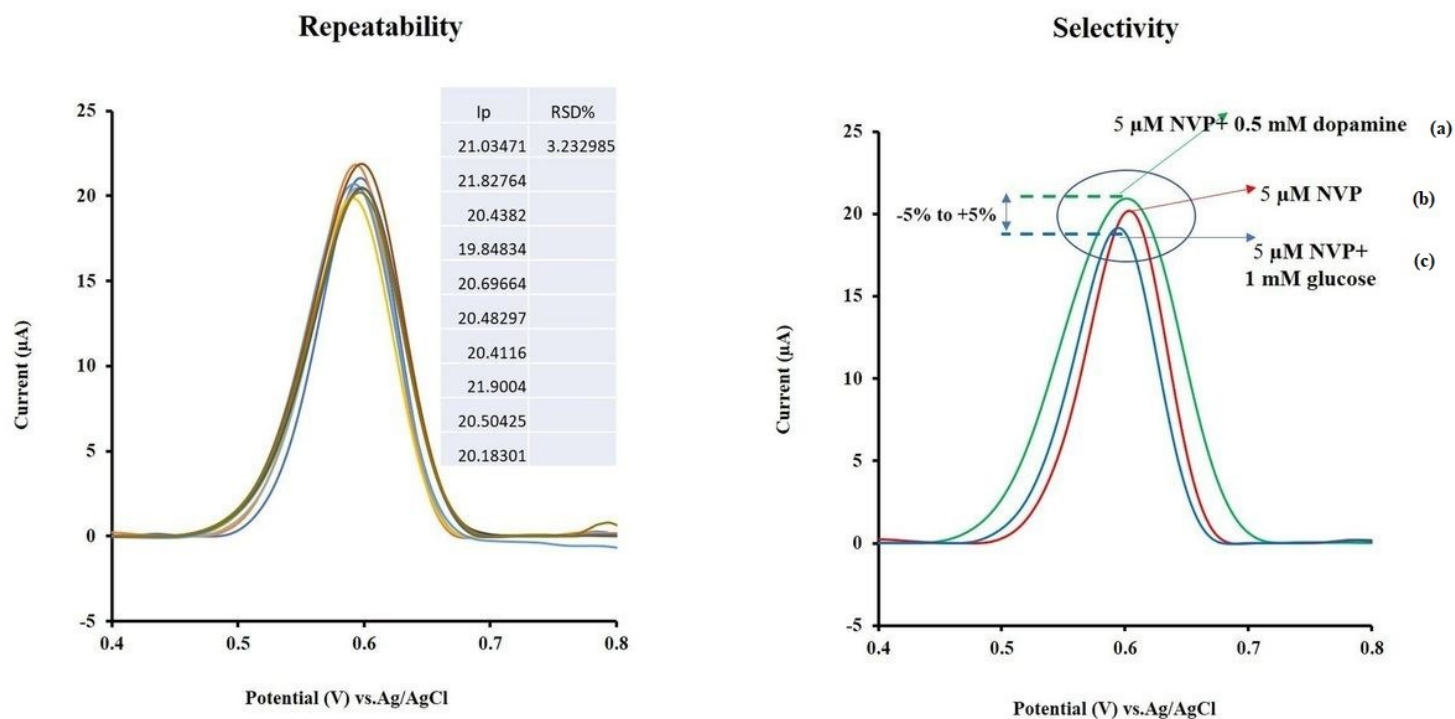

**Fig. S2**

**Repeatability:** DPASV of 5  $\mu$ M of NVP at MIP/ErGO/GCE at in a solution containing NaOH (0.01 M) and KCl (0.1 M). **b)** repeated for 10 times for investigating of repeatability of modified electrode

**Selectivity:** DPASV of 5  $\mu$ M of NVP **(b)** at MIP/ErGO/GCE in a solution containing NaOH (0.01 M) and KCl (0.1 M) in the presence of (a) 0.5 mM dopamine and (c) 1mM glucose for investigating of selectivity of modified electrode
